# Supplementary material for: Perovskite promoted iron oxide for hybrid water-splitting and syngas generation with exceptional conversion
Source: Royal Society of Chemistry journal article supplement (doi:10.1039/c4ee03431g), 2014-12-10
Supplement: c4ee03431g1.pdf [file c4ee03431g1.pdf]

## Electronic Supplementary Information

### **Perovskite promoted iron oxide for hybrid water-splitting and syngas generation with exceptional conversion**

Feng He, and Fanxing Li\*<sup>[a]</sup>

*Department of Chemical and Biomolecular Engineering, North Carolina State University, 911 Partners Way, Raleigh, NC 27695-7905, USA.*

*\*Email: [Fli5@ncsu.edu](mailto:Fli5@ncsu.edu)*

#### **This Supplementary information contains the following sections:**

Experimental method

Second law analysis on the impact of steam conversion on process efficiency

Steam conversion in the  $\text{FeO}_x\text{-H}_2\text{O-H}_2$  ternary system under equilibrium conditions

Non-stoichiometry within  $\text{La}_{0.8}\text{Sr}_{0.2}\text{FeO}_{3-\delta}$  perovskite

Steam to  $\text{H}_2$  conversion in the fixed bed experiments

Methane oxidation reaction in the layered reverse-flow reactor

Water-splitting reaction in the layered reverse-flow reactor

Process modeling of the hybrid solar-redox scheme

## Experimental method

### *Redox Catalyst Synthesis*

Lanthanum strontium ferrite ( $\text{La}_{0.8}\text{Sr}_{0.2}\text{FeO}_{3-\delta}$  or LSF) supported  $\text{Fe}_3\text{O}_4$  is used as the redox catalyst. We reported that LSF being an effective, mixed ionic-electronic conductive support to inhibit sintering of iron/iron oxides, thereby enhancing the redox activity and thermal stability of iron oxide based redox catalysts.<sup>1</sup>  $\text{Fe}_3\text{O}_4$ -LSF (25wt% LSF),  $\text{Fe}_3\text{O}_4$ -LSF (40wt% LSF), and pure LSF are synthesized by a solid-state reaction (SSR) method: a stoichiometric amount of precursors, i.e. iron oxide ( $\text{Fe}_2\text{O}_3$ , 99.9%, Noah Chemicals),  $\text{La}_2\text{O}_3$  (99.9%, Aldrich), and  $\text{SrCO}_3$  (99.9%, Noah Chemical), are weighed. This is followed by ball-milling, pelletization, and sintering at  $1200^\circ\text{C}$  for 12 hours. The resulting pellets are subsequently crushed and sieved into 75 to 150  $\mu\text{m}$ . A reference redox catalyst, i.e.  $\text{Fe}_3\text{O}_4$ - $\text{MgAl}_2\text{O}_4$  (40wt%  $\text{MgAl}_2\text{O}_4$ ), is prepared with an identical method. Since the as-prepared redox catalysts are composed of  $\text{Fe}_2\text{O}_3$  and LSF support, one cycle reduction followed with steam regeneration is performed to obtain  $\text{Fe}_3\text{O}_4$  phase. Crystallite phases of the resulting redox catalysts are confirmed using X-ray powder diffraction (XRD) (Rigaku SmartLab).

### *Fixed bed experiment*

Redox experiments are carried out in a stainless steel tubular reactor with an inner diameter of 5 mm (Figure S1) under a fixed-bed mode. The reactor is externally heated with a tube furnace (MTI OTF-1200X-S-VT) with K type thermocouple measuring the temperature. A gas mixing panel with multiple Brooks mass flow controllers (MFCs) is used to deliver gaseous mixtures, e.g. nitrogen and methane, to the reactor. In each experiment, 2 to 3 grams of redox catalyst particles are added on top of the SiC layer which serves as a gas distributor. In order to mimic the hybrid redox scheme, the tests are carried out in two consecutive steps, i.e. methane partial oxidation (redox catalyst reduction) and water-splitting (redox catalyst oxidation). The redox reaction temperature is set at  $930^\circ\text{C}$ .  $15\text{ ml min}^{-1}$  (STP: standard temperature  $0^\circ\text{C}$  and pressure 1 atm)  $\text{N}_2$  is used as the internal standard in both reduction and oxidation steps.  $10\text{ ml min}^{-1}$  (STP)  $\text{CH}_4$  is introduced along with  $\text{N}_2$  from the top of the reactor. Water-splitting reaction is carried out after the residue gas from the methane oxidation step has been completely purged with  $\text{N}_2$ . In the oxidation step, water is injected by a syringe pump (NE-300 Just Infusion<sup>TM</sup>) from the bottom of the reactor at a rate of  $0.278\text{ mmol min}^{-1}$ . Prior to entering the reactor, the water is vaporized and preheated. Compositions of the gases exiting the reactor are determined using a gas chromatograph (Agilent Micro GC 490) and a multi-gas analyzer (Emerson X-Stream gas analyzer). Parameters for evaluating the redox experiments are summarized in Table S1, where  $\dot{n}_i$  is the molar flow rate of component  $i$ , and in/out represents inlet/outlet streams of the reaction.

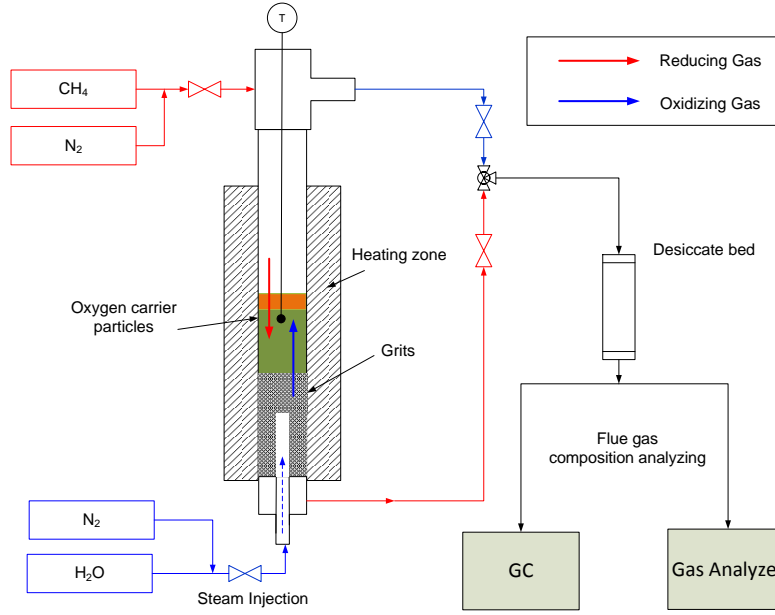

Figure S1: Experimental setup for hybrid redox process test with  $\text{Fe}_2\text{O}_3$ -LSF particle

Table S1: Summary of parameters used to characterize the redox reactions

| Parameters                         | Equations                                                                                                                                                      |
|------------------------------------|----------------------------------------------------------------------------------------------------------------------------------------------------------------|
| CH <sub>4</sub> Conversion         | $(1 - \frac{\dot{n}_{\text{CH}_4, \text{out}}}{\dot{n}_{\text{CH}_4, \text{in}}}) \times 100\%$                                                                |
| Syngas yield                       | $\frac{\dot{n}_{\text{H}_2, \text{out}} + \dot{n}_{\text{CO}, \text{out}}}{3\dot{n}_{\text{CH}_4, \text{in}}} \times 100\%$                                    |
| Steam to H <sub>2</sub> Conversion | $\frac{\dot{n}_{\text{H}_2, \text{out}}}{\dot{n}_{\text{H}_2\text{O}, \text{in}}} \times 100\%$                                                                |
| H <sub>2</sub> Purity              | $\frac{\dot{n}_{\text{H}_2, \text{out}}}{\dot{n}_{\text{H}_2, \text{out}} + \dot{n}_{\text{CO}, \text{out}} + \dot{n}_{\text{CO}_2, \text{out}}} \times 100\%$ |

### *H<sub>2</sub> analysis*

The concentration of H<sub>2</sub> in the experiment is determined by an online micro-GC (Agilent CP-490) with a molecular sieve 5A column. The GC is calibrated to achieve the correlation coefficient of  $R > 0.998$  for H<sub>2</sub>. Flow rate of H<sub>2</sub> generated is calculated by

$$V_{\text{H}_2} = \int (X_{\text{H}_2} F_{\text{Total}}) dt = \int (X_{\text{H}_2} \frac{F_{\text{N}_2}}{X_{\text{N}_2}}) dt \quad \text{Equation S1}$$

where  $F$  is the flow rate,  $X$  is the mole fraction and  $V$  is the total volume of the gas. N<sub>2</sub> is used as an internal standard. When CO and/or CO<sub>2</sub> is detected in the oxidation step, H<sub>2</sub> generated from carbon deposition is excluded based on the stoichiometry of steam carbon reactions:

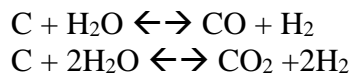

Reaction S1

Reaction S2

Steam to  $\text{H}_2$  conversion is then calculated by the amount of  $\text{H}_2$  generated divided by the injected  $\text{H}_2\text{O}$ . The flow rate of the syringe pump is independently calibrated through a gravimetric method. All the gas flows in the experiment are controlled by Brooks 5850E mass flow controllers (MFCs) which has 0.25% of rate in repeatability. Before each experiment, the gas flow rates are calibrated by a Bios Flow Calibrator (DryCal Definer 220 Primary) and a bubble flowmeter.

#### *Steam Conversion Verification using a Thermal Gravimetric Analyzer (TGA)*

Since steam conversion is an important parameter for the current study, a TGA (TA Instrument) with external reducing and oxidizing gas injection is used to independently verify steam conversion of the redox catalysts. A schematic of the TGA setup is shown in Figure S2. The aforementioned gas mixing panel with multiple mass flow controllers (MFCs) is used to deliver gaseous mixtures. The experiments are conducted with a sample weight of approximately 20 mg at a specific isothermal temperature.  $200 \text{ ml min}^{-1} \text{ N}_2$  and  $50 \text{ ml min}^{-1} \text{ H}_2$  is used as reducing gas, which is injected after the temperature reaches the setting. After 4 hours reduction or when the sample weight change is less than  $0.01 \text{ mg ml min}^{-1}$ ,  $\text{H}_2$  flow is stopped. This is followed with injection of oxidizing gas i.e.  $\text{H}_2$  and steam mixture. To ensure accurate injection of steam, a gas mixture of  $\text{N}_2$  and  $\text{H}_2$  is injected into a bubbler at  $50^\circ\text{C}$  to generate concentrated steam. The high concentration steam is then passed through another bubbler at  $20^\circ\text{C}$  ( $5^\circ\text{C}$  below room temperature) to create a gaseous stream that contains 2.34 mol% steam prior to entering the TGA. The premixed  $\text{H}_2$ -steam allows for accurate verification of steam conversion. To determine the maximum steam conversion,  $\text{H}_2$  flow rate is reduced by  $1 \text{ ml min}^{-1}$  until the sample weight in TGA start to increase. Provided that weight gain or oxidation of the redox catalyst is observed in the TGA at a given  $\text{H}_2$  mole fraction  $X_{\text{H}_2}$ , defined by  $\frac{F(\text{H}_2)}{F(\text{H}_2) + F(\text{H}_2\text{O})} \times 100\%$ , the redox catalyst is concluded to be capable of achieving steam conversion higher than  $X_{\text{H}_2}$ . The crystalline phases of the post-experiment redox catalysts are analyzed using X-ray powder diffraction (XRD) (Rigaku SmartLab) with  $\text{Cu-K}\alpha$  ( $\lambda=0.1542 \text{ nm}$ ) radiation within the  $20\text{-}80^\circ 2\theta$  angle range.

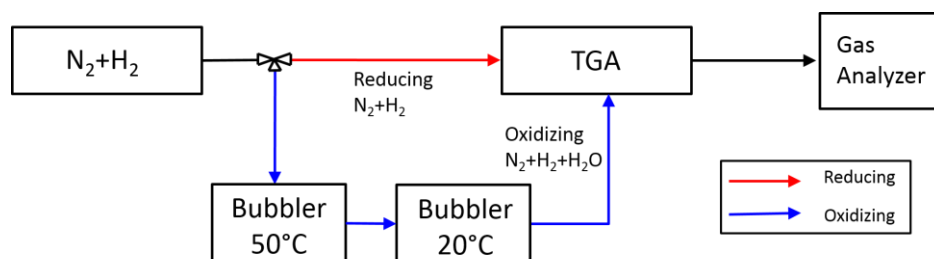

Figure S2: Schematic of TGA experimental setup with injection of reducing and oxidizing gases

### Second law analysis on the impact of steam conversion on process efficiency

Figure S3 shows a simplified schematic for exergy analysis on the water-splitting reaction.  $X$  mole of  $\text{H}_2\text{O}$  is converted into 1 mol  $\text{H}_2$ , with the steam conversion of  $1/X$ . In order to obtain the minimum exergy loss, we optimistically assume that the sensible heat for water and steam preheating can be fully recovered from product cooling with no heat loss. The most irreversible step is then resided in the product condensation step. It is noted that the product stream would have a lower total pressure ( $P_2$ ) and steam mole fraction  $(X-1)/X$  than those in the feed stream. Therefore, steam partial pressure and hence dew point of the product is lower than those of the feedstock. As a result, latent heat from steam condensation in the product stream cannot be fully recoverable. In addition, a minimum temperature difference, typically  $>5$  K, is required for effective heat exchange. This means that water-vaporization prior to water-splitting needs to be provided by external energy sources. If we further assume, optimistically, that a turbine is available to recover the latent heat from product steam condensation at 85% of Carnot efficiency with  $40^\circ\text{C}$  discharge temperature,<sup>2,3</sup> the exergy loss can be calculated using the following equation:

$$\Delta b = b_2 - b_1 = \left(1 - \frac{T_o}{T_1}\right) X \Delta \hat{H}_{evp} + 0.85 \left(1 - \frac{313}{T_r}\right) 5X \hat{C}_{p,steam} - 0.85 \left(1 - \frac{313}{T_2}\right) (X-1) \Delta \hat{H}_{evp} \quad \text{Equation S2}$$

For each additional mole of water being heated and condensed, the minimal exergy loss is estimated to be:

$$\Delta \hat{b} = \left(1 - \frac{T_o}{T_1}\right) \Delta \hat{H}_{evp} + 0.85 \left(1 - \frac{313}{T_r}\right) 5 \hat{C}_{p,steam} - 0.85 \left(1 - \frac{313}{T_2}\right) \Delta \hat{H}_{evp} \quad \text{Equation S3}$$

$\Delta H_{evp}$  is the mole heat of vaporization of water.  $T_o$  is the standard temperature of 298K and  $T_1$  is steam boiling temperature of 398K at 1 atm.  $T_2$  is the temperature at which latent heat from the unconverted steam is recovered (393K in this case).  $T_r$  is the temperature for the water-splitting reaction. Assuming a system pressure of 1 atm and water-splitting temperature of 1123K, minimum exergy loss is therefore estimated to be  $3.05 \text{ kJ mol}^{-1}$  of unconverted steam. Therefore, higher energy conversion efficiency can be anticipated with high steam to hydrogen conversion.

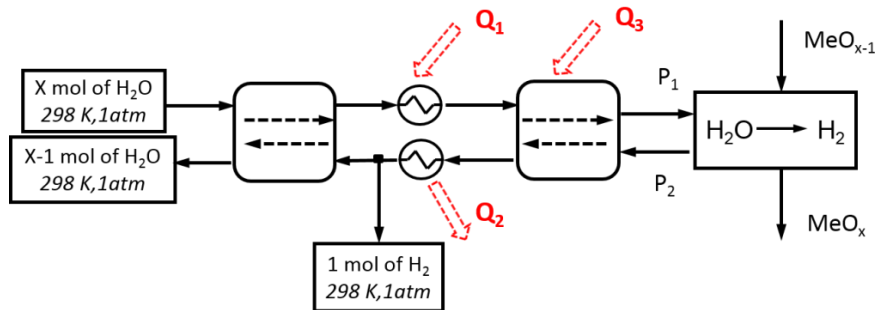

Figure S3: Exergy analysis on a simplified thermochemical water-splitting scheme

### Steam conversion in the FeO<sub>x</sub>-H<sub>2</sub>O-H<sub>2</sub> ternary system under equilibrium conditions

Thermodynamic analysis can provide maximum steam to H<sub>2</sub> conversion in the steam-iron reactions under varying temperatures. When metallic iron is oxidized to wüstite, steam has the highest conversion as compared to steam reaction with other types of iron oxides, as shown in the equilibrium phase diagram for the FeO<sub>x</sub>-H<sub>2</sub>O-H<sub>2</sub> ternary system (Figure S4).<sup>4</sup> At the reaction temperature of interest, wüstite typically exhibits cation deficiency with formula of FeO<sub>0.947</sub>. As a result, water-splitting reaction: 0.947Fe + H<sub>2</sub>O = FeO<sub>0.947</sub>O + H<sub>2</sub> should have the highest steam conversion for the FeO<sub>x</sub>-H<sub>2</sub>O-H<sub>2</sub> ternary system. Steam conversion (*X*) can be calculated by the following equation:

$$K = e^{\frac{-\Delta G}{RT}} = \frac{P_{H_2}}{P_{H_2O}} = \frac{X}{1-X} \quad \text{Equation S4}$$

where *K* is the equilibrium constant,  $\Delta G$  is the free energy change of the reaction at the given temperature. Using HSC Chemistry v7, the thermodynamic steam conversion as a function of temperature is calculated and the results are shown in Table S2. Steam conversion decreases with increasing temperatures. At 930 °C, the steam to hydrogen equilibrium conversion is 62.3%. Such a conversion is confirmed using ASPEN Plus®.

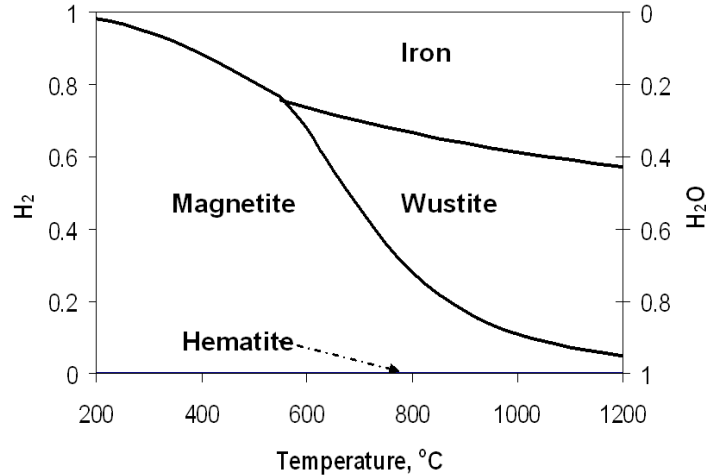

Figure S4: Phase diagram of the FeO<sub>x</sub>-H<sub>2</sub>O-H<sub>2</sub> ternary system

Table S2: Maximum steam to hydrogen conversion calculated by thermodynamic equilibrium

| T       | Steam Conversion |
|---------|------------------|
| 750 °C  | 68.8%            |
| 800 °C  | 66.8%            |
| 850 °C  | 65.0%            |
| 900 °C  | 63.3%            |
| 930 °C  | 62.3%            |
| 1000 °C | 60.2%            |

### Non-stoichiometry within $\text{La}_{0.8}\text{Sr}_{0.2}\text{FeO}_{3-\delta}$ perovskite

Perovskite used in the present work has a general formula of  $\text{La}_{0.8}\text{Sr}_{0.2}\text{FeO}_{3-\delta}$  (LSF). The Sr acceptor doped perovskite exhibits varying degree of oxygen non-stoichiometry at different oxygen partial pressures. A defect model<sup>5,6</sup> proposed by Mizusaki et al. is used to calculate the oxygen nonstoichiometry  $\delta$ . Based on the model, the reaction between  $\text{O}_2$  and oxygen defects in  $\text{La}_{1-x}\text{Sr}_x\text{FeO}_{3-\delta}$  is expressed as

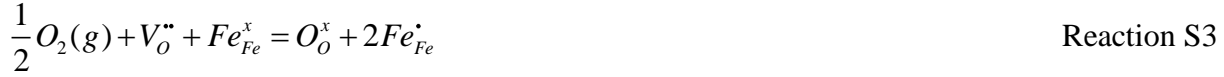

The equilibrium constant  $K_{Ox}$  is

$$K_{Ox} = \frac{[O_O^x][Fe_{Fe}^{\bullet}]^2}{p_{O_2}^{\frac{1}{2}}[V_O^{\bullet\bullet}][Fe_{Fe}^x]^2} = \frac{(3-\delta)[Fe_{Fe}^{\bullet}]^2}{p_{O_2}^{\frac{1}{2}}\delta[Fe_{Fe}^x]^2} \quad \text{Equation S5}$$

$$p_{O_2}^{\frac{1}{2}} = K_{wat} \frac{P_{H_2O}}{P_{H_2}} \quad \text{Equation S6}$$

The concentration of iron with different charges is determined by disproportionation of  $\text{Fe}^{\text{III}}$  to  $\text{Fe}^{\text{II}}$  and  $\text{Fe}^{\text{IV}}$ :

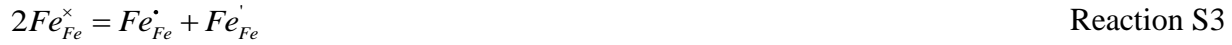

The equilibrium constant  $K_{Fe}$  is

$$K_{Fe} = \frac{[Fe_{Fe}^{\bullet}][Fe_{Fe}^{\bullet\bullet}]}{[Fe_{Fe}^x]^2} \quad \text{Equation S7}$$

For  $\text{La}_{0.8}\text{Sr}_{0.2}\text{FeO}_{3-\delta}$

$$[Fe_{Fe}^x] + [Fe_{Fe}^{\bullet}] + [Fe_{Fe}^{\bullet\bullet}] = 1 \quad \text{Equation S8}$$

$$x + [Fe_{Fe}^{\bullet}] = 2\delta + [Fe_{Fe}^{\bullet\bullet}] \quad \text{Equation S9}$$

Combined Equations S5 to S9,

$$\frac{\delta^{\frac{1}{2}}(2\delta - x + 1)}{(3 - \delta)^2(2\delta - x)} K_{wat}^{\frac{1}{2}} p_{O_2}^{\frac{1}{4}} = \frac{K_{Fe}}{K_{Ox}} \frac{(1 + x - 2\delta)(3 - \delta)^{\frac{1}{2}}}{\delta^{\frac{1}{2}}(2\delta - x)} \frac{1}{K_{wat}^{\frac{1}{2}} p_{O_2}^{\frac{1}{4}}} - \frac{1}{K_{Ox}^{\frac{1}{2}}} \quad \text{Equation S10}$$

where  $x = 0.2$  for  $\text{La}_{0.8}\text{Sr}_{0.2}\text{FeO}_{3-\delta}$ .  $P_{O_2}$  is the oxygen partial pressure.  $Fe_{Fe}^{\bullet}$ ,  $Fe_{Fe}^x$  and  $Fe_{Fe}^{\bullet\bullet}$  represents an Fe cation at the Fe site in the oxidation state of  $\text{Fe}^{\text{II}}$ ,  $\text{Fe}^{\text{III}}$  and  $\text{Fe}^{\text{IV}}$ , respectively. The relationship of the  $\text{La}_{0.8}\text{Sr}_{0.2}\text{FeO}_{3-\delta}$  oxygen deficiency ( $\delta$ ) with the steam conversion at 930 °C is given in Figure S5, by using the equilibrium constants reported by Mizusaki et al.<sup>6</sup>. The reduction of  $\text{Fe}^{\text{IV}}$  conversion to  $\text{Fe}^{\text{III}}$  and  $\text{Fe}^{\text{III}}$  to  $\text{Fe}^{\text{II}}$  occur in two separated stages  $0 < \delta < 0.1$  and  $0.1 < \delta < 0.6$ . At the steam conversion of 62.3%, which is the thermodynamically maximum steam conversion for  $\text{FeO}_x\text{-H}_2\text{O-H}_2$  ternary system, the  $\delta$  is equal to approximately 0.107. When  $\delta > 0.14$ , steam conversion of the defected perovskite is greater than 99%. This contributes to the high steam conversion obtained by the LSF supported iron oxide.

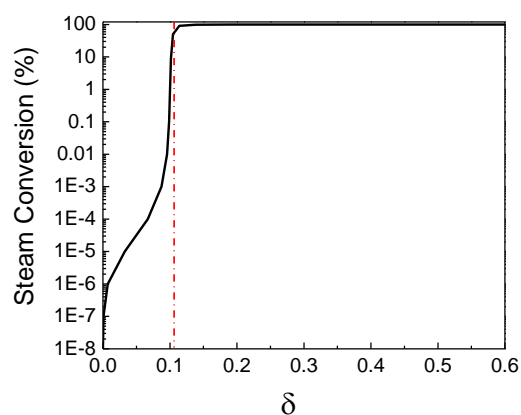

Figure S5: relationship between  $\text{La}_{0.8}\text{Sr}_{0.2}\text{FeO}_{3-\delta}$  oxygen deficiency ( $\delta$ ) and steam conversion at 930 °C. Red dash-dotted line displays thermodynamically predicted steam conversion for  $\text{Fe} \rightarrow \text{FeO}$  phase transition

Pure LSF tested in the TGA with  $\text{H}_2$  reduction (Figure S6) shows a total of ~10.5% weight loss. A comparison of the weight gain during steam oxidation from TGA results and defect model calculation are shown in Table S3. The weight gain under different steam conversion is normalized by fully oxidized sample weight. The data predicted by the defect model shows good consistency with experimental results. Based on the experimental results and theoretical calculations, LSF could achieve a higher steam conversion than iron oxides. Therefore, LSF is partially oxidized before reduced metallic iron start to react with steam.

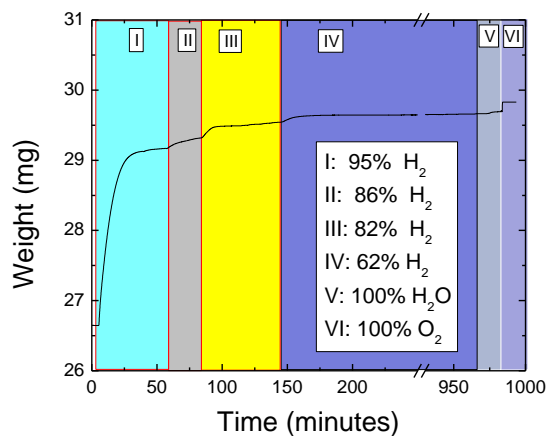

Figure S6: Pure LSF particle TGA test with steam and hydrogen mixture oxidation at 930°C

Table S3: Comparison on the normalized weight gain in the steam oxidation of the TGA results and defect model calculation

|                 | Defect Model Calculation | Experimental Data |
|-----------------|--------------------------|-------------------|
| >95% conversion | 10.0%                    | 8.5%              |
| >86% conversion | 10.2%                    | 9.0%              |
| >62% conversion | 10.2%                    | 10.1%             |



The theoretical steam to H<sub>2</sub> conversion based on the defect model can be calculated under two idealized cases:

(i) Additive effect of iron oxide and LSF

Under the additive scenario, iron (oxides) and LSF are well mixed and act independently for steam conversion in a simultaneous manner. Assuming that iron (oxide) is the limiting reactant, parallel reactions will lead to the following conversion:

$$X_{H_2O} = \frac{n_{H_2O_{converted}}}{n_{H_2O_{initial}}} = \frac{n_{O-LSF} + n_{O-Fe}}{\frac{n_{O-LSF}}{X_{H_2O-LSF}} + \frac{n_{O-Fe}}{X_{H_2O-Fe}}} \quad \text{Equation S11}$$

(ii) Sequential effect of iron oxide (first) and LSF (second)

Under the sequential scenario, iron (oxides) and LSF are assumed to react with steam in a consecutive manner. In such a configuration, defect in reduced LSF will be able to further enhance steam conversion by reacting with the steam-hydrogen mixture resulted from steam-iron reaction. Assuming that iron (oxide) is the limiting reactant, sequential reactions will lead to the following conversion:

$$X_{H_2O} = \frac{n_{H_2O_{converted}}}{n_{H_2O_{initial}}} = \frac{n_{O-LSF} + n_{O-Fe}}{\frac{n_{O-Fe}}{X_{H_2O-Fe}}} \quad (n_{O-LSF} < n_{O-Fe} (\frac{1}{X_{H_2O-Fe}} - 1)) \quad \text{Equation S12}$$

$n_{O-Fe}$  and  $n_{O-LSF}$  are the mole of oxygen gain in the water splitting reaction, and  $X_{O-Fe}$  and  $X_{O-LSF}$  are the corresponding steam conversion. The calculated results are shown in Figures 2 and 3 in the main paper.

### Steam to H<sub>2</sub> conversion in the fixed bed experiments

In order to demonstrate the high steam conversion, iron oxides with 25% and 40% La<sub>0.8</sub>Sr<sub>0.2</sub>FeO<sub>3-δ</sub> support and reference Fe<sub>3</sub>O<sub>4</sub>-MgAl<sub>2</sub>O<sub>4</sub> are tested in a fixed-bed reactor. Hydrogen is selected as the fuel in the reduction step for accurate initial assessment of steam conversion in the water-splitting step since no side reactions are likely to take place between hydrogen and the redox catalyst samples. The redox catalyst is reduced by H<sub>2</sub> for 30 minutes in the first step. After reduction, 6.8 ml min<sup>-1</sup> steam with 15 ml min<sup>-1</sup> N<sub>2</sub> is injected from the bottom of the reactor to oxidize the redox catalysts for 40 minutes. Then alternate reduction and regeneration of the redox catalyst will be implemented by the same procedure. The XRD pattern (Figure S7) indicates that redox catalyst is fully reduced to metallic iron in the reduction step. And in the oxidation step, it is regenerated into a mixture of Fe, FeO and Fe<sub>3</sub>O<sub>4</sub>, which has an average composition of FeO<sub>0.5</sub> by mass balance.

The impact of temperature on the steam to H<sub>2</sub> conversion is illustrated in Figure S8A for Fe<sub>3</sub>O<sub>4</sub>-LSF (40wt% LSF). There are two competing effects: (i) increasing temperature leads to lower steam conversion based on thermodynamics; (ii) increasing temperature enhances the reaction kinetics and hence increases steam conversion in the fixed bed. At a fixed space velocity of approximately 6 minutes<sup>-1</sup>, the maximum steam to H<sub>2</sub> conversion of Fe<sub>3</sub>O<sub>4</sub>-LSF(40wt%) is archived at 930 °C, which is consistent with the results of Fe<sub>3</sub>O<sub>4</sub>-LSF(25wt%). Therefore, 930 °C is selected as the nominal temperature in the paper. After that, multi-cycle experiment is

conducted at 930 °C in the fixed bed. As shown in Figure S8B, the average steam to H<sub>2</sub> conversion over 12 cycles of Fe<sub>3</sub>O<sub>4</sub>-LSF (25wt% LSF) and Fe<sub>3</sub>O<sub>4</sub>-LSF (40wt% LSF) is 64.0% ( $\pm 0.67\%$ ) and 67.1% ( $\pm 1.27\%$ ) with 95% confidence, respectively. In comparison, MgAl<sub>2</sub>O<sub>4</sub> spinel supported iron oxide shows a steam conversion of 39%, which is 25-28% lower than LSF promoted Fe<sub>3</sub>O<sub>4</sub> particle.

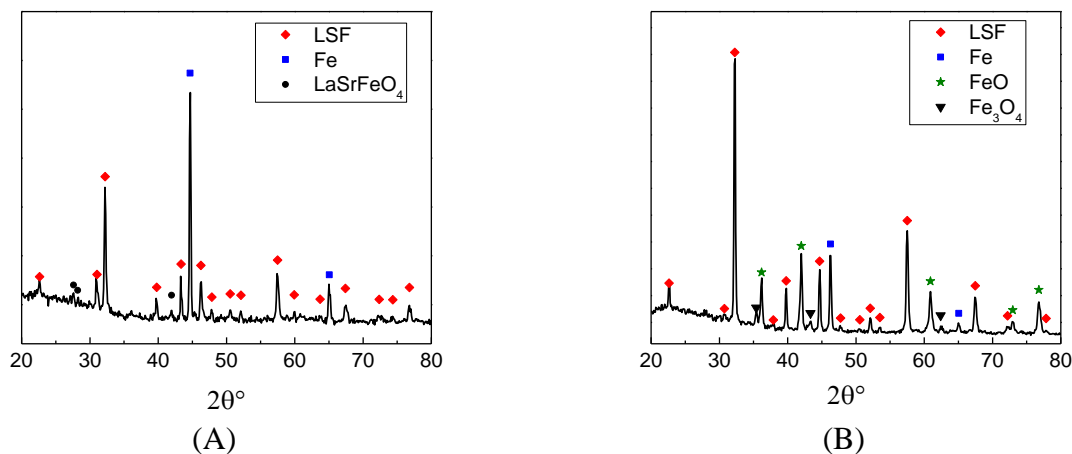

Figure S7: XRD Pattern of Fe<sub>3</sub>O<sub>4</sub>-LSF redox catalyst in the fixed bed experiment at 930 °C (A) reduced by hydrogen and (B) regenerated by steam.

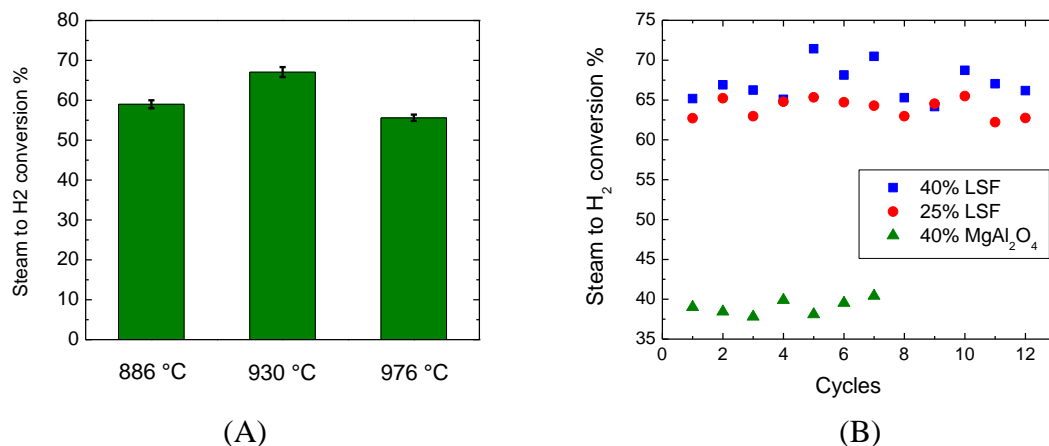

Figure S8: (A) The temperature effects on the steam to H<sub>2</sub> conversion per cycle for Fe<sub>3</sub>O<sub>4</sub>-LSF (40wt% LSF). (B) Average steam to H<sub>2</sub> conversion per cycle over multi-cycle at 930 °C.

### Methane oxidation reaction in the layered reverse-flow reactor

Redox study on Fe<sub>3</sub>O<sub>4</sub>-LSF is conducted in a layered reverse-flow reactor, where methane is injected from the top of the bed to reduce the redox catalyst. Neal et al.<sup>7</sup> reported that LSF has higher resistance towards coke formation compared to the iron oxides. In order to inhibit excessive carbon formation from methane decomposition, methane injection is stopped when H<sub>2</sub>/(CO+CO<sub>2</sub>) molar ratio exceeds 2. The product gas concentration as a function of time in the reducer is shown in Figure S9. The average methane conversion under the fixed-bed mode is

above 99%. The corresponding syngas ( $\text{CO}+\text{H}_2$ ) yield is  $\sim 62\%$  ( $\pm 3\%$ ) with a  $\text{H}_2/\text{CO}$  molar ratio of  $\sim 2.2$  ( $\pm 0.1$ ).

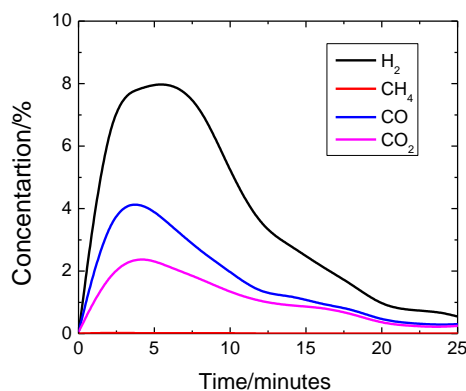

Figure S9: Product gases concentration ( $\text{N}_2$  and  $\text{H}_2\text{O}$ -free basis) as a function of time in methane oxidation step.

### Water-splitting reaction in the layered reverse-flow reactor

Water-splitting or steam-iron reaction is initiated by introducing steam into the reactor after the methane conversion step. Figure S10 shows a representative  $\text{H}_2$  purity profile (water-free and  $\text{N}_2$ -free basis) as a function of time. At the beginning of the steam oxidation, small amounts of  $\text{CO}$  and  $\text{CO}_2$  are detected, which corresponds to the gasification of carbon deposited in the methane oxidation step. Since it is well controlled to minimize the coke formation, an overall  $\text{H}_2$  purity of 98.5% is achieved in the water-splitting step.

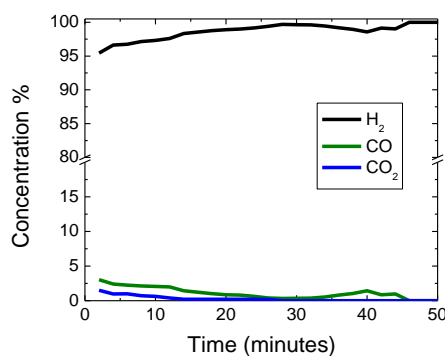

Figure S10:  $\text{H}_2$  concentration (water-free) during the water splitting step as a function of time at  $930^\circ\text{C}$  after the reduction step.

The layered reverse-flow reactor concept is proved in fixed bed experiments. Figure S11 shows a comparison of real time steam conversion between with and without layered reverse-flow. In the layered reverse-flow experiment, steam is going through the bottom  $\text{Fe}_3\text{O}_4$ -LSF bed with  $\sim 64.0\%$  steam converted in the first place. And then the top layer of reduced LSF further converts part of

the remaining steam into  $H_2$ , resulting in exceptional overall steam conversion of 77.2%. The average steam to  $H_2$  conversion in the layered reverse-flow experiment is ~10% high than the one without reverse flow.

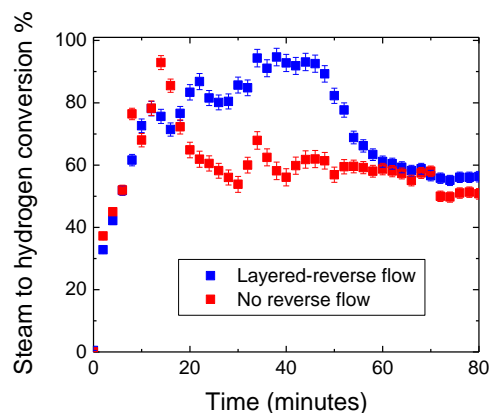

Figure S11: Real time steam conversion in oxidation with and without layered reverse-flow

### Process modeling of the hybrid solar-redox scheme

In the hybrid solar-redox scheme (Figure S12A), liquid fuel and hydrogen are produced from methane and integrated solar energy in two redox steps.<sup>8,9</sup> In the first step (reducer), methane is partial oxidized by redox catalyst material ( $Fe_3O_4$ -LSF) into CO and  $H_2$ , which is then converted into naphtha and diesel in the Fischer-Tropsch (F-T) reactors. In the subsequent step (oxidizer), steam oxidizes the reduced redox catalyst material from the previous step, producing concentrated  $H_2$ . ASPEN Plus simulation (Figure S12B) is used to estimate reactor and process performances of the hybrid solar-redox concept. Detailed simulation assumptions with respect to materials, simulation modules, property methods, physical property databanks, and key operating parameters are summarized in our previous publication.<sup>8</sup> The temperature of the reducer and oxidizer is set at 930 °C, which matches the experimental conditions. Two simulation cases with different steam to hydrogen conversions in the oxidizer are simulated, and the results are shown in Table S4. Case I is using the steam conversion of 77.2% which is achieved from the proposed layered reverse-flow reactor. Case II assumes steam conversion of 20%, which is the maximum reported conversion from literature. The incremental heat requirement from the low steam conversion in Case II is provided by conventional methane combustion, so that the solar energy usage is identical in the two cases. All other simulation assumptions and parameters are assumed to be same.<sup>8</sup> Under the scenario of no  $CO_2$  capture, case II uses 48% more methane to compensate the increased heat requirement through combustion. Therefore, with the benefit of exceptional steam to  $H_2$  conversion, Case I has the overall process thermal efficiency of 63.1%(HHV), which is 15.1% higher than case II with lower steam conversion.

A life cycle greenhouse gas (GHG) footprint analysis is conducted, which considers the contributions from natural gas upstream and energy conversion facility. The estimated upstream natural gas emission based on US-DOE report is in the range of 6.1-9.1 g  $CO_2$ /MJ for various feedstocks.<sup>10</sup> The emission analysis from energy conversion facility is based on ASPEN model results. When calculating the emission on hydrogen, a  $CO_2$  emission quota for the liquid fuel products is subtracted. The emission on liquid fuel products from the solar-redox process is

assumed to be identical to the one of petroleum derived fuels, which is reported at 90 g CO<sub>2</sub>/MJ<sup>11</sup>. Two scenarios are investigated for cases with and without CO<sub>2</sub> capture. 0.75 MJ/kg CO<sub>2</sub> energy consumption is assumed for the amine-based CO<sub>2</sub> capture.<sup>2</sup> The CO<sub>2</sub> footprint from the hybrid solar-redox scheme are shown in Table S3.

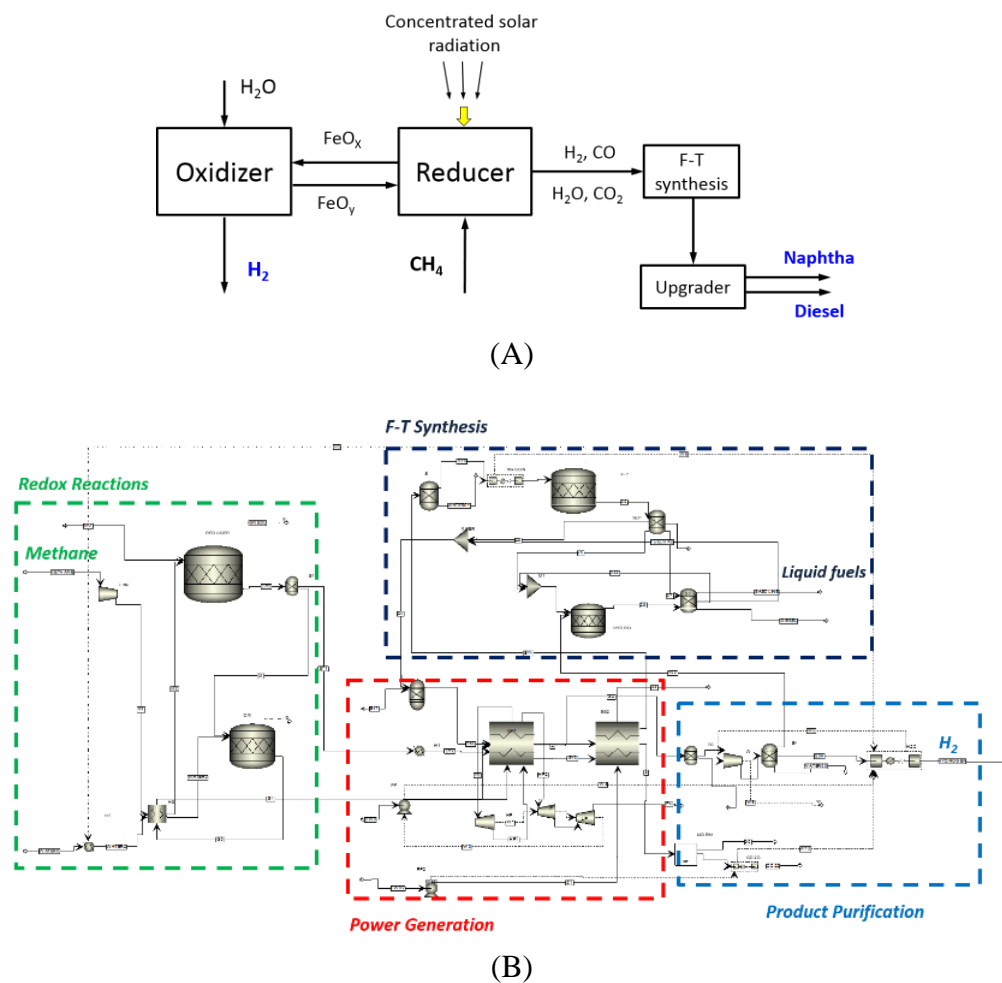

Figure S12: (A) Simplified schematic and (B) ASPEN flowsheet of the hybrid solar-redox scheme

Table S3. Process simulation results on the hybrid solar-redox cases

|                                           |                                      | Case I                          |                              | Case II                         |                              |
|-------------------------------------------|--------------------------------------|---------------------------------|------------------------------|---------------------------------|------------------------------|
|                                           |                                      | Without CO <sub>2</sub> Capture | With CO <sub>2</sub> Capture | Without CO <sub>2</sub> Capture | With CO <sub>2</sub> Capture |
| Steam to H <sub>2</sub> conversion        | %                                    | 77.2%                           |                              | 20%                             |                              |
| Methane input                             | t hr <sup>-1</sup>                   | 8.0                             |                              | 11.9                            |                              |
| Overall process efficiency                | HHV%                                 | 63.1                            | 61.3                         | 48.0                            | 45.4                         |
| CO <sub>2</sub> footprint on all hydrogen | g CO <sub>2</sub> /MJ H <sub>2</sub> | 44.4                            | 9.0                          | 96.7                            | 29.0                         |
| CO <sub>2</sub> footprint on all product  | g CO <sub>2</sub> /MJ                | 65.5                            | 38.8                         | 97.3                            | 45.7                         |

## References:

1. N. L. Galinsky, Y. Huang, A. Shafieifarhood and F. Li, *ACS Sustain. Chem. Eng.*, 2013, **1**, 364–373.
2. G. Rochelle, E. Chen, S. Freeman, D. Van Wagener, Q. Xu and A. Voice, *Chem. Eng. J.*, 2011, **171**, 725–733.
3. G. T. Rochelle, *Science*, 2009, **325**, 1652–1654.
4. D. R. Gaskell, *Introduction to metallurgical thermodynamics*, Hemisphere Pub. Corp., 1981.
5. A. Murugan, A. Thursfield and I. S. Metcalfe, *Energy Environ. Sci.*, 2011, **4**, 4639–4649.
6. J. Mizusaki, M. Yoshihiro, S. Yamauchi and K. Fueki, *J. Solid State Chem.*, 1985, **58**, 257–266.
7. L. M. Neal, A. Shafieifarhood and F. Li, *ACS Catal.*, 2014, **10**, 3560–3569.
8. F. He, J. Trainham, G. Parsons, J. S. Newman and F. Li, *Energy Environ. Sci.*, 2014, **7**, 2033–2042.
9. F. He and F. Li, *Int. J. Hydrog. Energy*, 2014, **39**, 18092–18102.
10. T. Skone, 2014, US DOE/NETL-2014/1646.  
<http://www.netl.doe.gov/File%20Library/Research/Energy%20Analysis/Life%20Cycle%20Analysis/NETL-NG-Power-LCA-29May2014.pdf>
11. K. Gerdes, T. Skone, 2009, US DOE/NET.  
<http://www.netl.doe.gov/File%20Library/Research/Energy%20Analysis/Publications/CompTranSpFuels-GHGEmisEnergySecImpacts---Pres.pdf>
